# Supplementary material
Source: PubMed Central journal article supplement (PMC3277292)
Supplement: NIHMS348278-supplement-1_si_001.pdf [file NIHMS348278-supplement-1_si_001.pdf]

## Supporting Information

# Probing the Effect of Conformational Constraint on Phosphorylated Ligand Binding to an SH2 Domain using Polarizable Force Field Simulations

*Yue Shi,<sup>1</sup> Crystal Z. Zhu,<sup>1</sup> Stephen Martin,<sup>2</sup> and Pengyu Ren<sup>1</sup>*

1. Department of Biomedical Engineering, 2. Division of Chemistry, The University of  
Texas at Austin, TX 78712,

Corresponding Author:  
Email: [pren@mail.utexas.edu](mailto:pren@mail.utexas.edu)

**Temperatures in Replica Exchange Molecular Dynamics Simulations (in K)**

260.00, 265.25, 270.59, 276.01, 281.76, 287.35, 293.03, 298.79, 304.63, 310.54, 316.57,  
322.69, 328.90, 335.21, 341.63, 348.14, 354.75, 361.46, 368.27, 375.18, 382.20, 389.33,  
396.57, 403.92, 411.38, 418.96, 426.66, 434.49, 442.43, 450.50, 458.68, 467.00, 475.45,  
484.03, 492.74, 501.59, 510.58, 519.71, 528.98, 538.39, 547.93, 557.64, 567.50, 577.52,  
587.69, 598.03, 608.03 and 619.03.

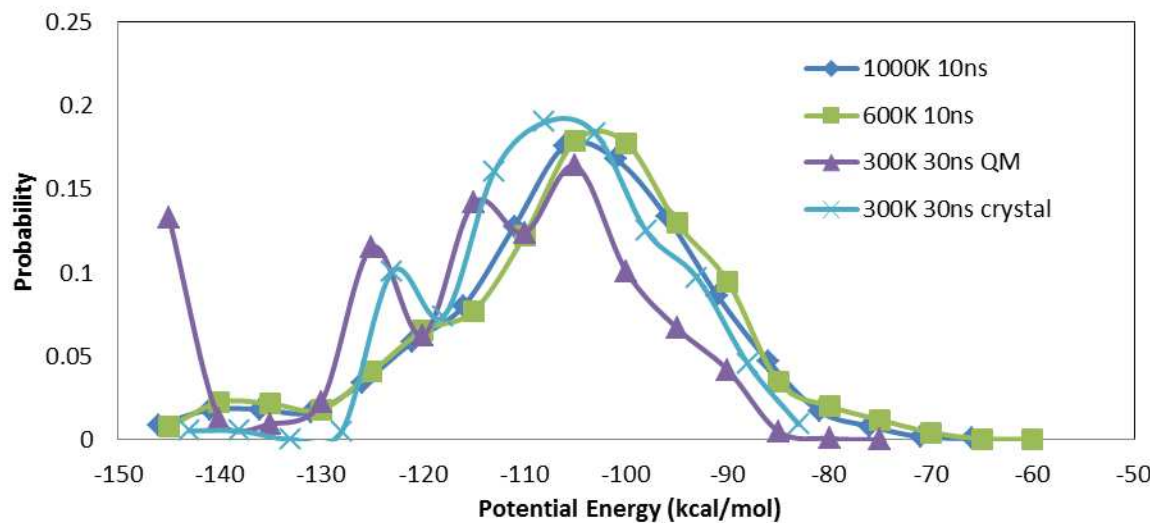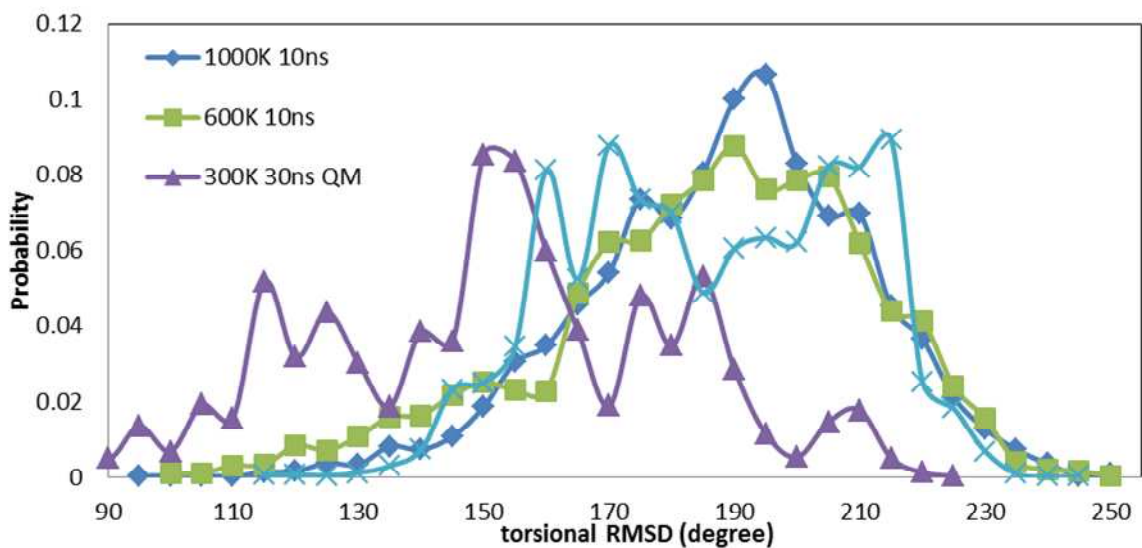

**Figure S1.** Potential energy distributions of configurations sampled at different temperatures (300 K, 600 K and 1000 K) and with different simulation length (10 ns and 30 ns). QM optimized structure and the structure taken from complex crystal structure are as the starting points for repeated simulations. The frames are sampled every 2 ps, and then minimized with a convergence of 0.1 kcal/mol/Å. Thus the conformational distributions we are examining are for 0K, even though the simulations have been done at high temperatures to accelerate the sampling process. The dihedral angles are measured

from 0~360 degree (instead of 0~180 degree) in order to capture all the different orientations. The QM optimized structure is selected as the reference to calculate torsional RMSDs for all snapshots.

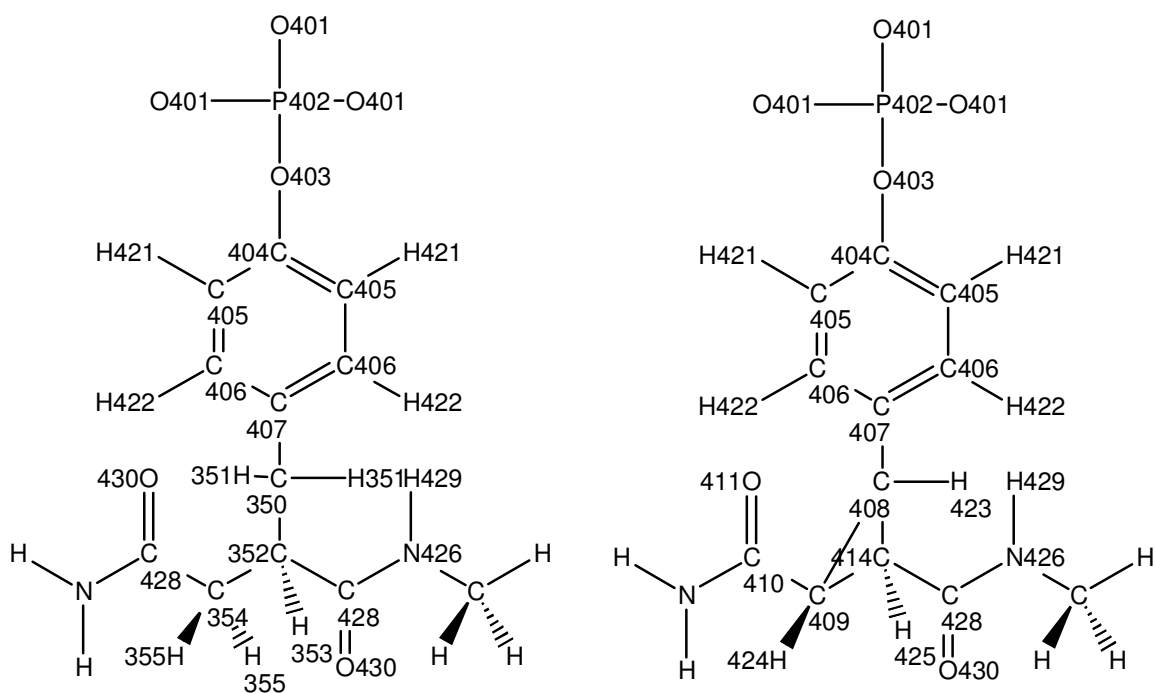

**Figure S2.** Atom types of model compounds used for parameterization. Parameters for C428, O430, N426 and H429 are transferred from AMOEBA PRO.

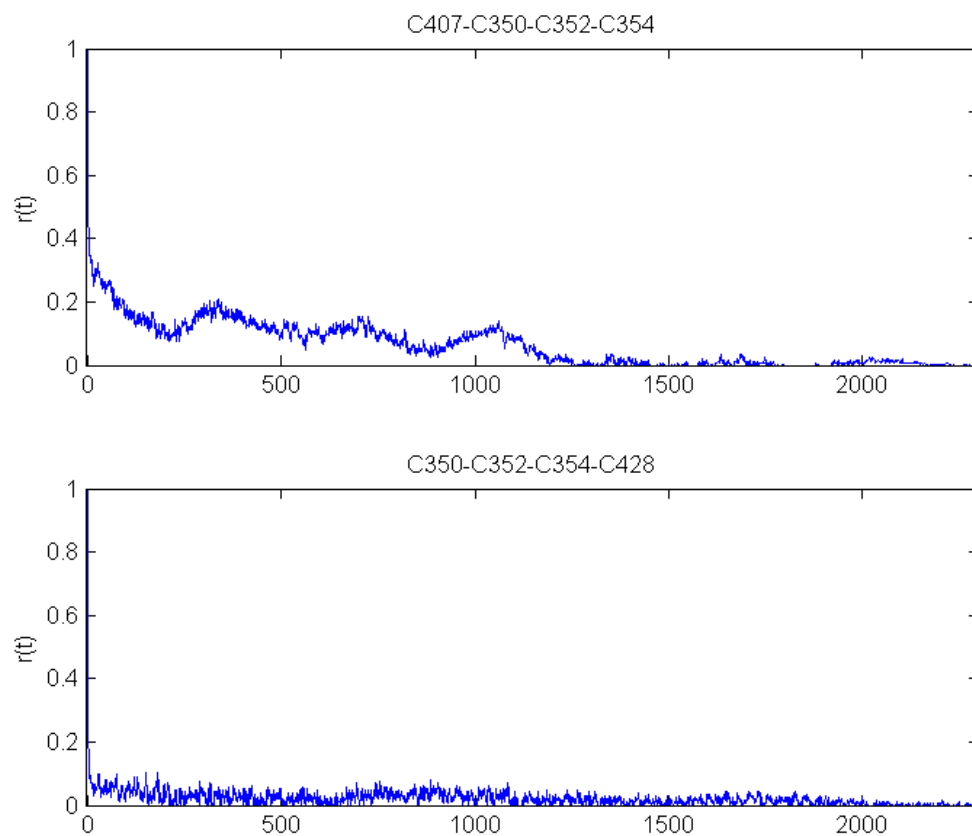

**Figure S3.** Autocorrelation of dihedral angle C407-C350-C352-C354 and C350-C352-C354-C428 of fpYVN in solvent from REMD simulation at 298 K.

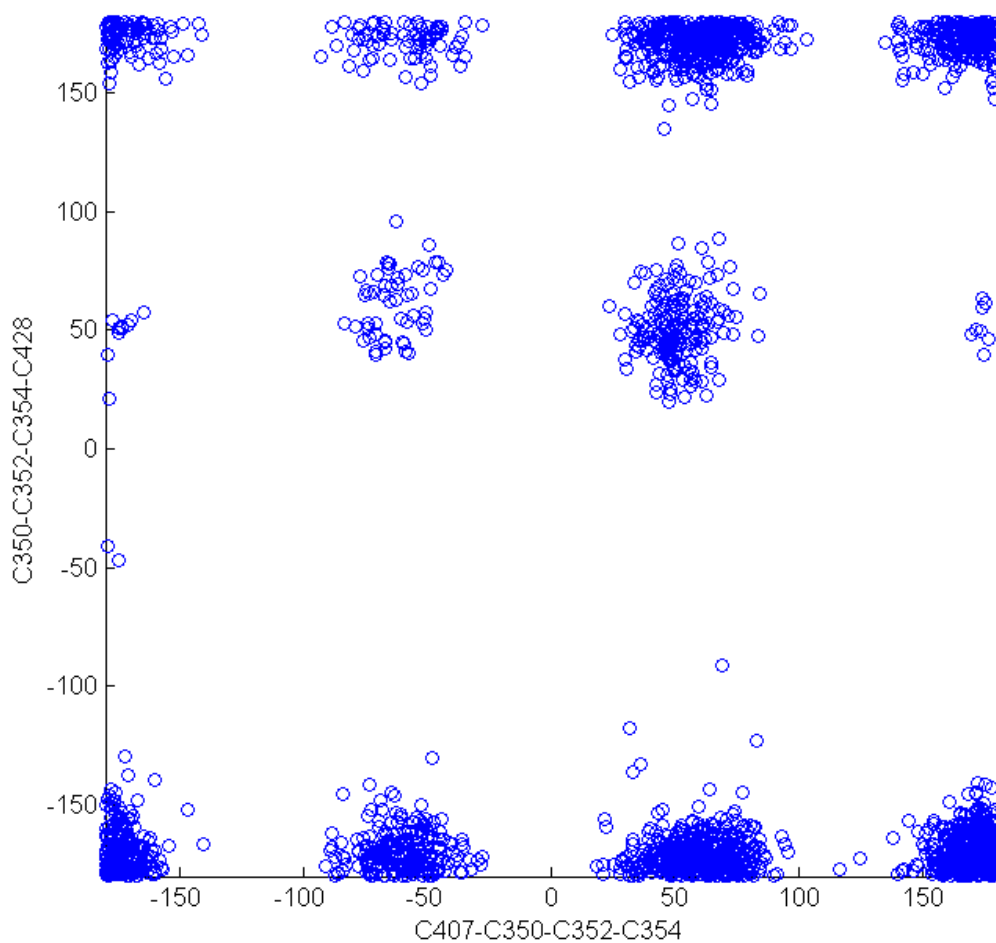

**Figure S4.** Conformational distribution of dihedral angle C407-C350-C352-C354 and C350-C352-C354-C428 of fpYVN in solvent from REMD simulation at 298 K.

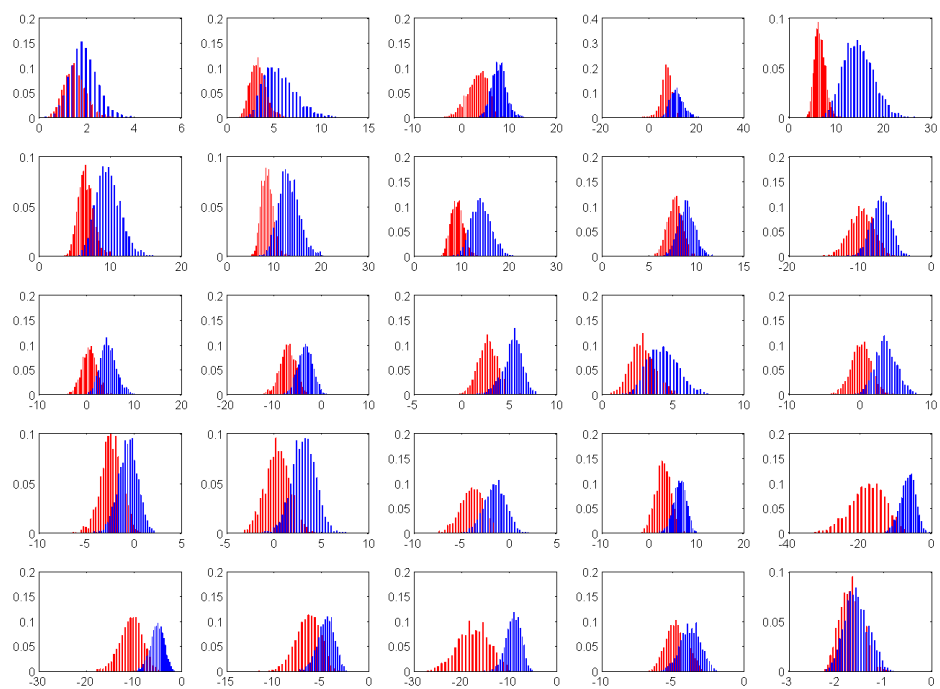

**Figure S5.** Overlap of potential energy differences calculated forward (blue) and backward (red) of perturbation from fpYVN to cpYVN in water. The X-axis represents the potential energy difference, and the Y-axis shows the probability.



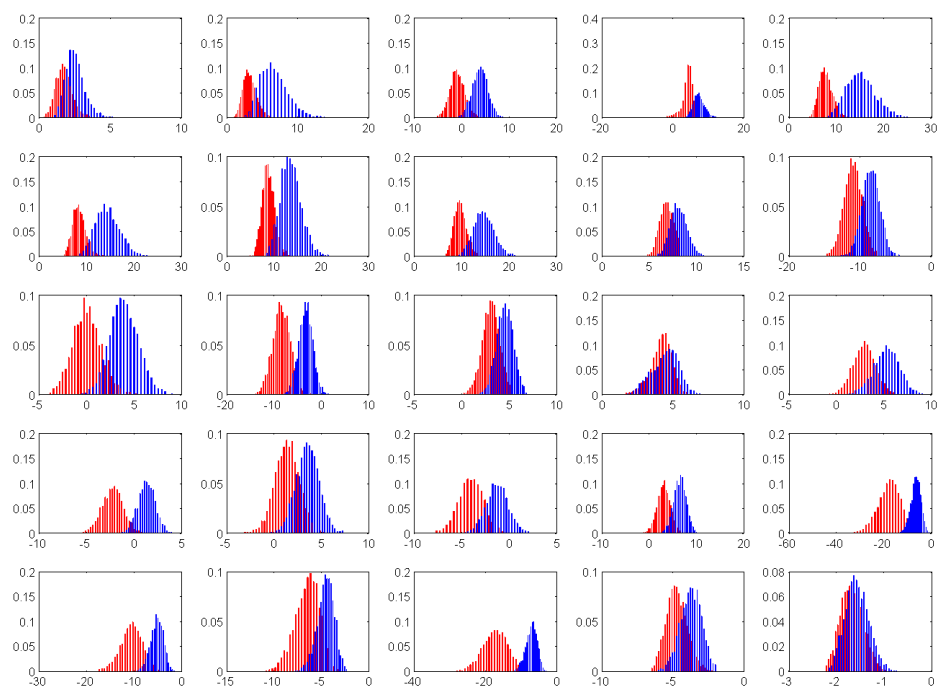

**Figure S6.** Overlap of potential energy differences calculated forward (blue) and backward (red) of perturbation from fpYVN to cpYVN in solvated complex. The X-axis represents the potential energy difference, and the Y-axis shows the probability.

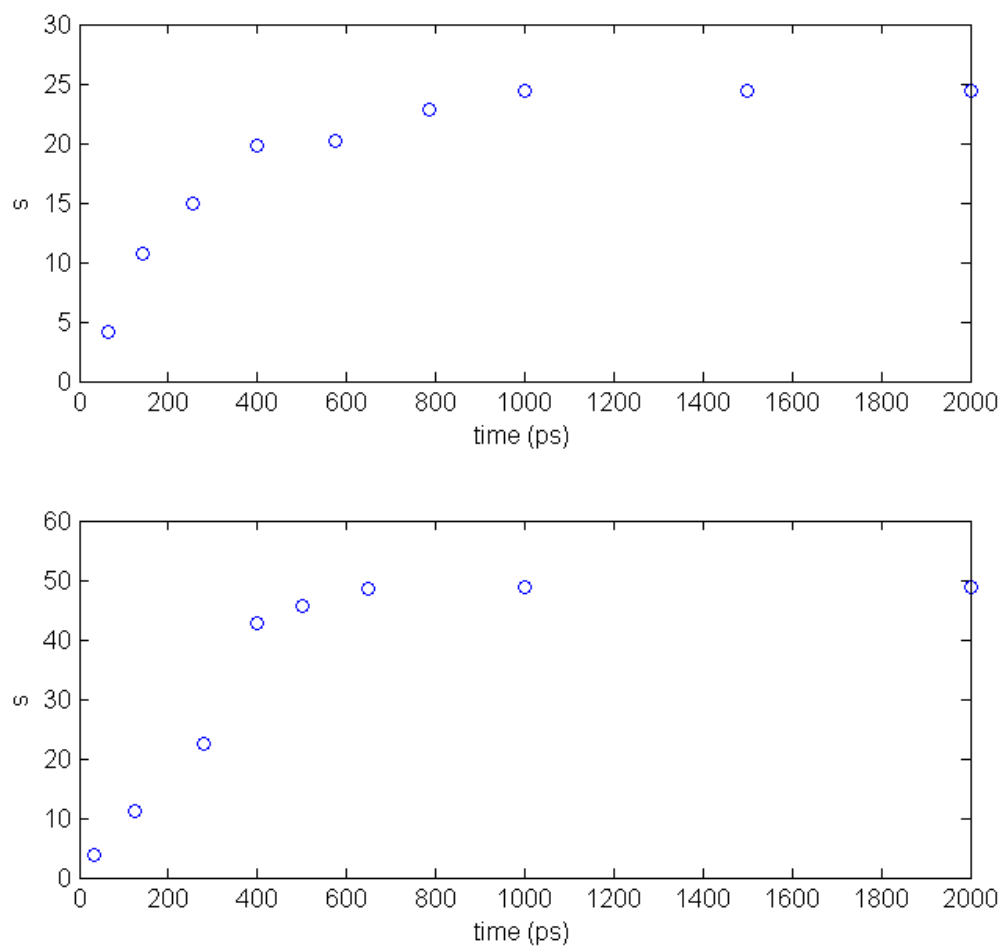

**Figure S7.** Statistical inefficiency of the free energy calculations for fpYVN->cpYVN in water (upper panel) and fpYVN in solvated complex (lower panel) at 298K.

| #  | complex              |           | solvent              |           | $\Delta\Delta G$ |
|----|----------------------|-----------|----------------------|-----------|------------------|
|    | $\Delta G_{complex}$ | deviation | $\Delta G_{solvent}$ | deviation |                  |
| 26 | 24.392               | 0.000     | 26.670               | 0.000     | -2.278           |
| 25 | 24.367               | -0.025    | 26.645               | -0.025    | -2.278           |
| 24 | 24.467               | 0.075     | 26.595               | -0.070    | -2.128           |
| 23 | 24.524               | 0.132     | 26.508               | -0.162    | -1.984           |
| 22 | 24.385               | -0.007    | 26.469               | -0.201    | -2.084           |
| 21 | 25.428               | 1.036     | 27.035               | 0.365     | -1.607           |
| 20 | 24.685               | 0.293     | 26.897               | 0.227     | -2.212           |
| 13 | 26.034               | 1.642     | 27.032               | 0.362     | -0.998           |

**Table S1.** The dependence of relative binding free energy (fpYVN->cpYVN) at 298K on the number of intermediate steps in the alchemical calculation (energy in kcal/mol). Every 2<sup>nd</sup> (13 steps total), 4<sup>th</sup> (20 steps), 5<sup>th</sup> (21 steps), 6<sup>th</sup> (22 steps), 7<sup>th</sup> (23 steps), 10<sup>th</sup> (24 steps), 13<sup>th</sup> (23 steps with the middle step skipped) step is skipped respectively.

**Force Field Parameters of the Model Compounds in Figure S2**

#atom #atom type #atom class #atom name #description #atomic number #mass

#connectivity

|      |     |     |   |          |    |        |   |
|------|-----|-----|---|----------|----|--------|---|
| atom | 401 | 401 | O | " O401 " | 8  | 15.999 | 1 |
| atom | 402 | 402 | P | " P402 " | 15 | 30.974 | 4 |
| atom | 403 | 403 | O | " O403 " | 8  | 15.999 | 2 |
| atom | 404 | 404 | C | " C404 " | 6  | 12.011 | 3 |
| atom | 405 | 404 | C | " C405 " | 6  | 12.011 | 3 |
| atom | 406 | 404 | C | " C406 " | 6  | 12.011 | 3 |
| atom | 407 | 404 | C | " C407 " | 6  | 12.011 | 3 |
| atom | 408 | 405 | C | " C408 " | 6  | 12.011 | 4 |
| atom | 409 | 406 | C | " C409 " | 6  | 12.011 | 4 |
| atom | 410 | 407 | C | " C410 " | 6  | 12.011 | 3 |
| atom | 411 | 408 | O | " O411 " | 8  | 15.999 | 1 |
| atom | 414 | 406 | C | " C414 " | 6  | 12.011 | 4 |
| atom | 423 | 414 | H | " H423 " | 1  | 1.008  | 1 |
| atom | 424 | 415 | H | " H424 " | 1  | 1.008  | 1 |
| atom | 425 | 415 | H | " H425 " | 1  | 1.008  | 1 |
| atom | 350 | 350 | C | " C350 " | 6  | 12.011 | 4 |
| atom | 354 | 354 | C | " C354 " | 6  | 12.011 | 4 |
| atom | 352 | 352 | C | " C352 " | 6  | 12.011 | 4 |
| atom | 351 | 351 | H | " H351 " | 1  | 1.008  | 1 |
| atom | 355 | 355 | H | " H355 " | 1  | 1.008  | 1 |
| atom | 353 | 353 | H | " H353 " | 1  | 1.008  | 1 |

#vdw #atom cluass #diameter #epsilon #scaling factor for H

|     |     |  |       |        |      |
|-----|-----|--|-------|--------|------|
| vdw | 401 |  | 3.360 | 0.1120 |      |
| vdw | 402 |  | 4.450 | 0.3900 |      |
| vdw | 403 |  | 3.405 | 0.1120 |      |
| vdw | 404 |  | 3.800 | 0.0910 |      |
| vdw | 405 |  | 3.820 | 0.1010 |      |
| vdw | 406 |  | 3.820 | 0.1010 |      |
| vdw | 407 |  | 3.820 | 0.1060 |      |
| vdw | 408 |  | 3.300 | 0.1120 |      |
| vdw | 414 |  | 2.960 | 0.0240 | 0.92 |
| vdw | 415 |  | 2.960 | 0.0240 | 0.92 |
| vdw | 350 |  | 3.820 | 0.1010 |      |
| vdw | 354 |  | 3.820 | 0.1010 |      |
| vdw | 352 |  | 3.820 | 0.1010 |      |
| vdw | 351 |  | 2.960 | 0.0240 | 0.92 |
| vdw | 355 |  | 2.960 | 0.0240 | 0.92 |
| vdw | 353 |  | 2.960 | 0.0240 | 0.92 |

#bond #atom class 1 #atom class 2 #force constant #bond length

|      |     |     |       |        |
|------|-----|-----|-------|--------|
| bond | 401 | 402 | 775.0 | 1.4924 |
| bond | 402 | 403 | 450.0 | 1.8897 |
| bond | 403 | 404 | 465.0 | 1.2769 |
| bond | 404 | 404 | 680.0 | 1.3975 |

|        |       |         |               |               |                 |                    |
|--------|-------|---------|---------------|---------------|-----------------|--------------------|
| bond   | 404   | 405     | 385.0         | 1.4997        |                 |                    |
| bond   | 405   | 406     | 385.0         | 1.5059        |                 |                    |
| bond   | 405   | 414     | 400.0         | 1.0795        |                 |                    |
| bond   | 406   | 407     | 385.0         | 1.4955        |                 |                    |
| bond   | 406   | 406     | 385.0         | 1.5116        |                 |                    |
| bond   | 406   | 415     | 400.0         | 1.0740        |                 |                    |
| bond   | 407   | 408     | 680.0         | 1.2059        |                 |                    |
| bond   | 350   | 404     | 385.0         | 1.5128        |                 |                    |
| bond   | 350   | 352     | 385.0         | 1.5486        |                 |                    |
| bond   | 350   | 351     | 400.0         | 1.0864        |                 |                    |
| bond   | 354   | 417     | 385.0         | 1.5253        |                 |                    |
| bond   | 352   | 354     | 385.0         | 1.5639        |                 |                    |
| bond   | 354   | 355     | 400.0         | 1.0826        |                 |                    |
| bond   | 352   | 417     | 385.0         | 1.5287        |                 |                    |
| bond   | 352   | 353     | 400.0         | 1.0844        |                 |                    |
| #angle | #atom | class 1 | #atom class 2 | #atom class 3 | #force constant | #equilibrium angle |
| angle  | 401   | 402     | 401           | 89.88         | 117.42          |                    |
| angle  | 401   | 402     | 403           | 75.86         | 99.34           |                    |
| angle  | 402   | 403     | 404           | 95.30         | 122.17          |                    |
| angle  | 403   | 404     | 404           | 60.00         | 121.93          |                    |
| angle  | 404   | 404     | 404           | 60.00         | 119.99          |                    |
| angle  | 404   | 404     | 413           | 32.00         | 119.09          |                    |
| angle  | 404   | 404     | 405           | 60.00         | 121.69          |                    |
| angle  | 404   | 405     | 406           | 60.00         | 122.94          |                    |
| angle  | 404   | 405     | 414           | 38.00         | 116.06          |                    |
| angle  | 406   | 405     | 406           | 60.00         | 60.25           |                    |
| angle  | 406   | 405     | 414           | 38.00         | 111.42          |                    |
| angle  | 405   | 406     | 407           | 60.00         | 123.48          |                    |
| angle  | 405   | 406     | 406           | 60.00         | 59.87           |                    |
| angle  | 405   | 406     | 415           | 38.00         | 115.50          |                    |
| angle  | 406   | 406     | 407           | 60.00         | 119.61          |                    |
| angle  | 407   | 406     | 415           | 38.00         | 113.15          |                    |
| angle  | 406   | 406     | 415           | 38.00         | 115.00          |                    |
| angle  | 406   | 407     | 408           | 60.00         | 121.75          |                    |
| angle  | 350   | 404     | 404           | 60.00         | 120.79          |                    |
| angle  | 352   | 350     | 404           | 60.00         | 110.70          |                    |
| angle  | 351   | 350     | 404           | 38.00         | 111.43          |                    |
| angle  | 351   | 350     | 352           | 38.00         | 108.50          |                    |
| angle  | 351   | 350     | 351           | 34.50         | 106.14          |                    |
| angle  | 352   | 354     | 417           | 60.00         | 111.73          |                    |
| angle  | 355   | 354     | 417           | 38.00         | 108.50          |                    |
| angle  | 352   | 354     | 355           | 38.00         | 110.23          |                    |
| angle  | 355   | 354     | 355           | 34.50         | 107.53          |                    |
| angle  | 354   | 417     | 419           | 60.00         | 119.10          |                    |
| angle  | 354   | 417     | 416           | 60.00         | 117.10          |                    |
| angle  | 350   | 352     | 354           | 60.00         | 114.08          |                    |

```

angle 350 352 417 60.00 111.41
angle 350 352 353 38.00 107.12
angle 354 352 417 60.00 111.33
angle 353 352 354 38.00 106.83
angle 353 352 417 38.00 105.49
angle 352 417 419 60.00 123.74
angle 352 417 416 60.00 114.38
#stretch bend #atom class #force constant1 #force constant2 #force constant3
strbnd 402 7.20 4.30 0.00
strbnd 403 14.40 0.00 0.00
strbnd 404 38.00 0.00 0.00
strbnd 405 18.70 18.70 0.00
strbnd 406 18.70 18.70 0.00
strbnd 407 18.70 18.70 0.00
strbnd 350 18.70 11.50 0.00
strbnd 354 18.70 11.50 0.00
strbnd 352 18.70 11.50 0.00
#out of plane #atom class 1 #atom class 2 #force constant
opbnd 404 403 1.60
opbnd 404 404 0.80
opbnd 404 405 1.60
opbnd 407 406 0.65
opbnd 407 408 0.65
opbnd 404 350 0.20
opbnd 417 354 0.20
opbnd 417 419 0.20
opbnd 417 416 0.20
opbnd 417 352 0.20
#torsion #atom class 1 #atom class 2 #atom class 3 #atom class 4 #force constant #phase
angle #nth fold
torsion 413 404 404 413 0.000 0.0 1 4.070 180.0 2 0.000 0.0 3
torsion 404 404 404 405 -0.610 0.0 1 4.210 180.0 2 0.000 0.0 3
torsion 413 404 404 405 0.000 0.0 1 6.100 180.0 2 0.000 0.0 3
torsion 404 404 405 406 -3.034 0.0 1 1.393 111.0 2 1.590 0.0 3
torsion 404 404 405 414 0.000 0.0 1 0.000 180.0 2 -0.090 0.0 3
torsion 404 405 406 407 0.180 0.0 1 0.170 180.0 2 0.520 0.0 3
torsion 404 405 406 406 0.180 0.0 1 0.170 180.0 2 0.520 0.0 3
torsion 404 405 406 415 0.000 0.0 1 0.000 180.0 2 0.340 0.0 3
torsion 406 405 406 407 0.180 0.0 1 0.170 180.0 2 0.520 0.0 3
torsion 406 405 406 415 0.000 0.0 1 0.000 180.0 2 0.340 0.0 3
torsion 414 405 406 407 0.000 0.0 1 0.000 180.0 2 0.340 0.0 3
torsion 414 405 406 406 0.000 0.0 1 0.000 180.0 2 0.340 0.0 3
torsion 414 405 406 415 0.000 0.0 1 0.000 180.0 2 0.300 0.0 3
torsion 405 406 406 407 0.180 0.0 1 0.170 180.0 2 0.520 0.0 3
torsion 405 406 406 415 0.000 0.0 1 0.000 180.0 2 0.340 0.0 3
torsion 407 406 406 405 0.180 0.0 1 0.170 180.0 2 0.520 0.0 3

```

|                 |       |       |                 |           |        |     |   |       |       |   |        |     |   |
|-----------------|-------|-------|-----------------|-----------|--------|-----|---|-------|-------|---|--------|-----|---|
| torsion         | 407   | 406   | 406             | 407       | 0.180  | 0.0 | 1 | 0.170 | 180.0 | 2 | 0.520  | 0.0 | 3 |
| torsion         | 407   | 406   | 406             | 415       | 0.000  | 0.0 | 1 | 0.000 | 180.0 | 2 | 0.340  | 0.0 | 3 |
| torsion         | 415   | 406   | 406             | 415       | 0.000  | 0.0 | 1 | 0.000 | 180.0 | 2 | 0.300  | 0.0 | 3 |
| torsion         | 405   | 406   | 407             | 408       | -3.300 | 0.0 | 1 | 2.510 | 180.0 | 2 | 1.180  | 0.0 | 3 |
| torsion         | 405   | 406   | 407             | 409       | 0.000  | 0.0 | 1 | 0.000 | 180.0 | 2 | 0.800  | 0.0 | 3 |
| torsion         | 406   | 406   | 407             | 408       | 0.000  | 0.0 | 1 | 0.000 | 180.0 | 2 | 0.000  | 0.0 | 3 |
| torsion         | 406   | 406   | 407             | 409       | 0.000  | 0.0 | 1 | 0.000 | 180.0 | 2 | 0.000  | 0.0 | 3 |
| torsion         | 415   | 406   | 407             | 408       | -3.300 | 0.0 | 1 | 2.510 | 180.0 | 2 | 1.180  | 0.0 | 3 |
| torsion         | 415   | 406   | 407             | 409       | 0.000  | 0.0 | 1 | 0.000 | 180.0 | 2 | 0.800  | 0.0 | 3 |
| torsion         | 404   | 404   | 404             | 350       | -0.610 | 0.0 | 1 | 4.210 | 180.0 | 2 | 0.000  | 0.0 | 3 |
| torsion         | 413   | 404   | 404             | 350       | 0.000  | 0.0 | 1 | 6.100 | 180.0 | 2 | 0.000  | 0.0 | 3 |
| torsion         | 352   | 350   | 404             | 404       | -0.495 | 0.0 | 1 | 0.720 | 180.0 | 2 | -0.484 | 0.0 | 3 |
| torsion         | 351   | 350   | 404             | 404       | 0.000  | 0.0 | 1 | 0.000 | 180.0 | 2 | -0.090 | 0.0 | 3 |
| torsion         | 404   | 350   | 352             | 354       | -2.284 | 0.0 | 1 | 1.340 | 180.0 | 3 | 0.000  | 0.0 | 3 |
| torsion         | 404   | 350   | 352             | 417       | -3.229 | 0.0 | 1 | 0.588 | 180.0 | 2 | 0.000  | 0.0 | 3 |
| torsion         | 404   | 350   | 352             | 353       | 0.000  | 0.0 | 1 | 0.000 | 180.0 | 2 | 0.500  | 0.0 | 3 |
| torsion         | 351   | 350   | 352             | 354       | 0.000  | 0.0 | 1 | 0.000 | 180.0 | 2 | 0.500  | 0.0 | 3 |
| torsion         | 351   | 350   | 352             | 417       | 0.000  | 0.0 | 1 | 0.000 | 180.0 | 2 | 0.180  | 0.0 | 3 |
| torsion         | 351   | 350   | 352             | 353       | 0.000  | 0.0 | 1 | 0.000 | 180.0 | 2 | 0.299  | 0.0 | 3 |
| torsion         | 352   | 354   | 417             | 419       | 0.000  | 0.0 | 1 | 0.000 | 180.0 | 2 | 0.000  | 0.0 | 3 |
| torsion         | 352   | 354   | 417             | 416       | 0.000  | 0.0 | 1 | 0.000 | 180.0 | 2 | 0.000  | 0.0 | 3 |
| torsion         | 355   | 354   | 417             | 419       | 0.000  | 0.0 | 1 | 0.000 | 180.0 | 2 | 0.235  | 0.0 | 3 |
| torsion         | 355   | 354   | 417             | 416       | 0.000  | 0.0 | 1 | 0.000 | 180.0 | 2 | -0.010 | 0.0 | 3 |
| torsion         | 350   | 352   | 354             | 417       | -0.536 | 0.0 | 1 | 0.869 | 180.0 | 2 | -0.995 | 0.0 | 3 |
| torsion         | 417   | 352   | 354             | 417       | -2.457 | 0.0 | 1 | 0.853 | 180.0 | 2 | -0.025 | 0.0 | 3 |
| torsion         | 353   | 352   | 354             | 417       | 0.000  | 0.0 | 1 | 0.000 | 180.0 | 2 | 0.500  | 0.0 | 3 |
| torsion         | 350   | 352   | 354             | 355       | 0.000  | 0.0 | 1 | 0.000 | 180.0 | 2 | 0.500  | 0.0 | 3 |
| torsion         | 417   | 352   | 354             | 355       | 0.000  | 0.0 | 1 | 0.000 | 180.0 | 2 | 0.500  | 0.0 | 3 |
| torsion         | 353   | 352   | 354             | 355       | 0.000  | 0.0 | 1 | 0.000 | 180.0 | 2 | 0.500  | 0.0 | 3 |
| torsion         | 424   | 416   | 417             | 354       | -1.000 | 0.0 | 1 | 2.000 | 180.0 | 2 | 2.000  | 0.0 | 3 |
| torsion         | 418   | 416   | 417             | 354       | 0.000  | 0.0 | 1 | 1.000 | 180.0 | 2 | 0.800  | 0.0 | 3 |
| torsion         | 350   | 352   | 417             | 419       | -3.000 | 0.0 | 1 | 0.000 | 180.0 | 2 | 0.000  | 0.0 | 3 |
| torsion         | 350   | 352   | 417             | 416       | 3.000  | 0.0 | 1 | 0.000 | 180.0 | 2 | 0.000  | 0.0 | 3 |
| torsion         | 354   | 352   | 417             | 419       | -1.150 | 0.0 | 1 | 0.000 | 180.0 | 2 | 1.280  | 0.0 | 3 |
| torsion         | 354   | 352   | 417             | 416       | 0.000  | 0.0 | 1 | 0.000 | 180.0 | 2 | 0.300  | 0.0 | 3 |
| torsion         | 353   | 352   | 417             | 419       | 0.000  | 0.0 | 1 | 0.000 | 180.0 | 2 | 0.000  | 0.0 | 3 |
| torsion         | 353   | 352   | 417             | 416       | 0.000  | 0.0 | 1 | 0.000 | 180.0 | 2 | 0.000  | 0.0 | 3 |
| torsion         | 424   | 416   | 417             | 352       | -1.000 | 0.0 | 1 | 2.000 | 180.0 | 2 | 2.000  | 0.0 | 3 |
| torsion         | 418   | 416   | 417             | 352       | 0.000  | 0.0 | 1 | 1.000 | 180.0 | 2 | 0.800  | 0.0 | 3 |
| torsion         | 352   | 417   | 416             | 421       | -1.000 | 0.0 | 1 | 2.000 | 180.0 | 2 | 2.000  | 0.0 | 3 |
| #polarizability | #atom | type  | #polarizability | #polarize | group  |     |   |       |       |   |        |     |   |
| polarize        | 401   | 0.837 | 402             |           |        |     |   |       |       |   |        |     |   |
| polarize        | 402   | 1.828 | 401             | 403       |        |     |   |       |       |   |        |     |   |
| polarize        | 403   | 0.837 | 402             |           |        |     |   |       |       |   |        |     |   |
| polarize        | 404   | 1.334 | 405             |           |        |     |   |       |       |   |        |     |   |
| polarize        | 405   | 1.334 | 404             | 406       | 421    |     |   |       |       |   |        |     |   |

```

polarize 406 1.334 405 407 422
polarize 407 1.334 406
polarize 408 1.334 409 414 415 423
polarize 409 1.334 408 414 424
polarize 410 1.334 411 444
polarize 411 0.837 410
polarize 414 1.334 408 409 425
polarize 423 0.496 408
polarize 424 0.496 409
polarize 425 0.496 414
polarize 350 1.334 352 351
polarize 354 1.334 355
polarize 352 1.334 350 353
polarize 351 0.496 350
polarize 355 0.496 354
polarize 353 0.496 352
#multipole #atom type #local frames #monopole,dipole,quadrupole
multipole 401 402 401 -1.02024
-0.00509 0.00000 0.02124
-0.21597
0.00000 -0.20175
0.10909 0.00000 0.41772
multipole 402 403 404 1.75484
0.02795 0.00000 0.29813
0.12864
0.00000 -0.01112
0.16427 0.00000 -0.11752
multipole 403 402 404 -0.65419
0.15410 0.00000 0.04551
0.08581
0.00000 0.13303
-0.03766 0.00000 -0.21884
multipole 404 403 405 0.30569
-0.05638 0.00000 -0.10878
-0.02058
0.00000 0.15420
-0.02871 0.00000 -0.13362
multipole 405 404 406 -0.15435
-0.09942 0.00000 -0.37999
-0.05282
0.00000 -0.39415
-0.40538 0.00000 0.44697
multipole 406 405 -407 0.15385
0.15153 0.00000 0.52078
-0.72529
0.00000 -0.95398

```



|           |     |     |      |          |          |          |
|-----------|-----|-----|------|----------|----------|----------|
|           |     |     |      | -0.01560 | 0.00000  | 1.67927  |
| multipole | 407 | 406 | -406 | -0.14822 |          |          |
|           |     |     |      | 0.06758  | 0.00000  | -0.44854 |
|           |     |     |      | 0.49878  |          |          |
|           |     |     |      | 0.00000  | -0.50762 |          |
|           |     |     |      | -0.84078 | 0.00000  | 0.00884  |
| multipole | 408 | 407 | 409  | -0.01053 |          |          |
|           |     |     |      | 0.25957  | 0.00000  | -0.42521 |
|           |     |     |      | 0.61143  |          |          |
|           |     |     |      | 0.00000  | -0.42324 |          |
|           |     |     |      | -0.39716 | 0.00000  | -0.18819 |
| multipole | 409 | 410 | 408  | -0.12452 |          |          |
|           |     |     |      | 0.26921  | 0.00000  | -0.05962 |
|           |     |     |      | -0.34013 |          |          |
|           |     |     |      | 0.00000  | -0.52238 |          |
|           |     |     |      | -0.54093 | 0.00000  | 0.86251  |
| multipole | 410 | 411 | 444  | 0.75664  |          |          |
|           |     |     |      | 0.16992  | 0.00000  | 0.40025  |
|           |     |     |      | 0.37203  |          |          |
|           |     |     |      | 0.00000  | 0.26442  |          |
|           |     |     |      | 0.01882  | 0.00000  | -0.63645 |
| multipole | 411 | 410 | 444  | -0.77899 |          |          |
|           |     |     |      | -0.04005 | 0.00000  | -0.15258 |
|           |     |     |      | -0.24470 |          |          |
|           |     |     |      | 0.00000  | 0.13023  |          |
|           |     |     |      | -0.07153 | 0.00000  | 0.11447  |
| multipole | 414 | 415 | 408  | -0.27531 |          |          |
|           |     |     |      | 0.06593  | 0.00000  | 0.02909  |
|           |     |     |      | 0.11429  |          |          |
|           |     |     |      | 0.00000  | -0.12510 |          |
|           |     |     |      | -0.60512 | 0.00000  | 0.01081  |
| multipole | 423 | 408 | 407  | 0.05149  |          |          |
|           |     |     |      | -0.01080 | 0.00000  | -0.00337 |
|           |     |     |      | 0.02311  |          |          |
|           |     |     |      | 0.00000  | -0.13107 |          |
|           |     |     |      | -0.03020 | 0.00000  | 0.10796  |
| multipole | 424 | 409 | 408  | 0.08718  |          |          |
|           |     |     |      | -0.05374 | 0.00000  | 0.08463  |
|           |     |     |      | -0.02788 |          |          |
|           |     |     |      | 0.00000  | -0.22397 |          |
|           |     |     |      | 0.11821  | 0.00000  | 0.25185  |
| multipole | 425 | 414 | 408  | 0.08030  |          |          |
|           |     |     |      | -0.12310 | 0.00000  | -0.17009 |
|           |     |     |      | -0.13346 |          |          |
|           |     |     |      | 0.00000  | 0.23636  |          |
|           |     |     |      | -0.05699 | 0.00000  | -0.10290 |

|           |     |     |     |          |          |          |
|-----------|-----|-----|-----|----------|----------|----------|
| multipole | 428 | 430 | 354 | 0.85068  |          |          |
|           |     |     |     | -0.01685 | 0.00000  | 0.27745  |
|           |     |     |     | 0.29463  |          |          |
|           |     |     |     | 0.00000  | -0.41598 |          |
|           |     |     |     | -0.00743 | 0.00000  | 0.12135  |
| multipole | 428 | 430 | 352 | 0.85068  |          |          |
|           |     |     |     | -0.01685 | 0.00000  | 0.27745  |
|           |     |     |     | 0.29463  |          |          |
|           |     |     |     | 0.00000  | -0.41598 |          |
|           |     |     |     | -0.00743 | 0.00000  | 0.12135  |
| multipole | 430 | 428 | 352 | -0.77770 |          |          |
|           |     |     |     | -0.01897 | 0.00000  | -0.21786 |
|           |     |     |     | -0.61542 |          |          |
|           |     |     |     | 0.00000  | 0.33936  |          |
|           |     |     |     | 0.00866  | 0.00000  | 0.27606  |
| multipole | 430 | 428 | 354 | -0.77770 |          |          |
|           |     |     |     | -0.01897 | 0.00000  | -0.21786 |
|           |     |     |     | -0.61542 |          |          |
|           |     |     |     | 0.00000  | 0.33936  |          |
|           |     |     |     | 0.00866  | 0.00000  | 0.27606  |
| multipole | 350 | 407 | 352 | -0.07300 |          |          |
|           |     |     |     | 0.54428  | 0.00000  | -0.21148 |
|           |     |     |     | 0.55213  |          |          |
|           |     |     |     | 0.00000  | -0.40597 |          |
|           |     |     |     | -0.31298 | 0.00000  | -0.14616 |
| multipole | 354 | 428 | 352 | -0.12505 |          |          |
|           |     |     |     | 0.35636  | 0.00000  | 0.12083  |
|           |     |     |     | 0.85801  |          |          |
|           |     |     |     | 0.00000  | -0.71012 |          |
|           |     |     |     | -0.17159 | 0.00000  | -0.14789 |
| multipole | 352 | 428 | 350 | -0.42976 |          |          |
|           |     |     |     | 0.05048  | 0.00000  | 0.10288  |
|           |     |     |     | 0.24143  |          |          |
|           |     |     |     | 0.00000  | -0.23770 |          |
|           |     |     |     | -0.12466 | 0.00000  | -0.00373 |
| multipole | 351 | 350 | 407 | 0.03751  |          |          |
|           |     |     |     | -0.00850 | 0.00000  | -0.09826 |
|           |     |     |     | -0.15828 |          |          |
|           |     |     |     | 0.00000  | 0.18088  |          |
|           |     |     |     | -0.03180 | 0.00000  | -0.02260 |
| multipole | 355 | 354 | 428 | 0.08131  |          |          |
|           |     |     |     | 0.03321  | 0.00000  | -0.08398 |
|           |     |     |     | 0.10608  |          |          |
|           |     |     |     | 0.00000  | 0.13680  |          |
|           |     |     |     | 0.09275  | 0.00000  | -0.24288 |
| multipole | 353 | 352 | 350 | 0.07719  |          |          |

|          |         |          |
|----------|---------|----------|
| -0.02946 | 0.00000 | 0.06650  |
| 0.06868  |         |          |
| 0.00000  | 0.22176 |          |
| -0.26490 | 0.00000 | -0.29044 |

This information is available free of charge via the Internet at <http://pubs.acs.org>.
